# Supplementary material
Source: publisher figshare collection journal article supplement (https://frontiersin.figshare.com/ndownloader/files/31054042)
Supplement: Supplementary file 1 [file 31054042]

**(Supplement)** Table 1. Monthly variations in cell abundances (cells mL-1) of phytoplankton at Jinhae Bay during July – September in 2014 conducted by regular red-tide monitoring by NIFS (KODC, 2021).

| Station | Latitude | Longitude | July | |  | August | |  | September | |  |
| --- | --- | --- | --- | --- | --- | --- | --- | --- | --- | --- | --- |
| Diatoms | Flagellates |  | Diatoms | Flagellates |  | Diatoms | Flagellates |  |
| G13 | 35.0739 | 128.7547 | 15 | 2 |  | 112 | 8 |  | 110 | 122 |  |
| G14 | 35.0525 | 128.7869 | 15 | 2 |  | 129 | 13 |  | 66 | 1 |  |
| G15 | 35.1219 | 128.6831 | 8 | 2 |  | 891 | 9 |  | 31 | 171 |  |
| G16 | 35.0717 | 128.6422 | 5 | 6 |  | 992 | 13 |  | 9 | 201 |  |
| G17 | 35.1306 | 128.9422 | 5 | 29 |  | 780 | 7 |  | 13 | 52 |  |
| G18 | 35.0844 | 128.4836 | 3 | 42 |  | 5 | 0 |  | 218 | 53 |  |
| G19 | 34.9800 | 128.4619 | 59 | 6 |  | 67 | 8 |  | 9 | 201 |  |
| G20 | 34.9142 | 128.4350 | 9 | 3 |  | 1,298 | 0 |  | 6 | 2 |  |
| G21 | 34.9353 | 128.5614 | 11 | 13 |  | 89 | 9 |  | 7 | 14 |  |
| G22 | 34.9689 | 128.6150 | 12 | 2 |  | 9 | 7 |  | 10 | 3 |  |
| G23 | 35.0217 | 128.6589 | 21 | 4 |  | 59 | 7 |  | 6 | 1 |  |
| G24 | 35.0061 | 128.8519 | 82 | 1 |  | 127 | 12 |  | 31 | 11 |  |
| G25 | 34.8856 | 128.7542 | 35 | 3 |  | 88 | 6 |  | 50 | 102 |  |
| G26 | 35.0333 | 129.0369 | 68 | 10 |  | 55 | 9 |  | 23 | 11 |  |

**(Supplement)** Table 2. Temporal variations in cell abundances (cells mL-1) of phytoplankton at Tongyeong-Geoje Bay during August – September in 2014 conducted by special red-tide monitoring by NIFS (KODC, 2021).

| Station | Latitude | Longitude | 18th August | |  | 1st September | |  | 15th September | |  |
| --- | --- | --- | --- | --- | --- | --- | --- | --- | --- | --- | --- |
| Diatoms | Flagellates |  | Diatoms | Flagellates |  | Diatoms | Flagellates |  |
| T1 | 34.7010 | 128.4179 | 56 | 18 |  | 57 | 131 |  | 300 | 0 |  |
| T2 | 34.5939 | 128.4179 | 64 | 5 |  | 46 | 191 |  | 230 | 13 |  |
| T3 | 34.8162 | 128.2944 | 597 | 4 |  | 557 | 28 |  | 249 | 33 |  |
| T4 | 34.5857 | 128.3027 | 18 | 0 |  | 51 | 2,001 |  | 73 | 2 |  |
| T5 | 34.8052 | 128.1325 | 709 | 9 |  | 111 | 923 |  | 193 | 20 |  |
| T6 | 34.6872 | 128.1325 | 245 | 4 |  | 533 | 1,205 |  | 61 | 5 |  |
| T7 | 34.5765 | 128.1370 | 7 | 0 |  | 7 | 0 |  | 98 | 5 |  |
| T8 | 34.6324 | 128.0173 | 13 | 5 |  | 532 | 66 |  | 49 | 5 |  |
| T9 | 34.5500 | 128.0228 | 1,184 | 3 |  | 2 | 1 |  | 448 | 2 |  |
| T10 | 34.7119 | 127.8335 | 1,041 | 3 |  | 1,293 | 302 |  | 363 | 1 |  |
| T11 | 34.5775 | 127.8417 | 1,148 | 0 |  | 242 | 1,100 |  | 420 | 0 |  |
| T12 | 34.4595 | 127.8335 | 604 | 1 |  | 579 | 2 |  | 67 | 0 |  |
